# Supplementary material for: Influence of monsoonal winds on chlorophyll-α distribution in the Beibu Gulf
Source: PLoS One. 2018 Jan 12;13(1):e0191051. doi: 10.1371/journal.pone.0191051 (PMC5766212; doi:10.1371/journal.pone.0191051)
Supplement: S5 File — Scatter plot of monthly chl-a vs. monthly wind speed from 2002 to 2014 averaged over the Beibu Gulf. (XLS) [file pone.0191051.s005.xls]

## Sheet: MAMO_CHLO_4km.CR.l3m_data.Jul20
********	** Monthly MA	MO_CHLO_4k	m.CR	product **********
Selected	Application:	timeserie	s
chloroph	yll a concent	ration 4km	[mg/	m**3] (l3m_data)
Selected	time period:	Jul2002 -	2014-12-02	13
Selected	area for ave	raging: La	t(17,	22), Lon(105.5, 110)
Fill val	ue: -32767.0
time	l3m_data
(month)	[mg/m**3]
2002-07-01	0.376	30.655
2002-08-01	0.947	29.94
2002-09-01	0.875	29.067
2002-10-01	1.094	27.525
2002-11-01	1.416	25.937
2002-12-01	1.067	24.406
2003-01-01	1.888	21.188
2003-02-01	0.957	21.984
2003-03-01	1.022	23.671
2003-04-01	0.673	26.059
2003-05-01	0.581	28.447
2003-06-01	0.666	29.961
2003-07-01	0.824	30.28
2003-08-01	1.005	30.616
2003-09-01	0.917	29.572
2003-10-01	1.074	28.243
2003-11-01	1.093	26.701
2003-12-01	1.759	23.07
2004-01-01	1.465	22.234
2004-02-01	1.46	20.85
2004-03-01	0.599	22.002
2004-04-01	0.575	25.585
2004-05-01	0.728	27.909
2004-06-01	0.819	29.71
2004-07-01	0.93	29.567
2004-08-01	0.888	30.662
2004-09-01	0.915	29.478
2004-10-01	1.622	27.555
2004-11-01	1.026	26.344
2004-12-01	1.377	23.663
2005-01-01	1.527	21.305
2005-02-01	1.373	21.797
2005-03-01	1.22	21.03
2005-04-01	2.168	24.504
2005-05-01	0.605	28.329
2005-06-01	0.352	29.333
2005-07-01	0.734	30.197
2005-08-01	1.416	29.604
2005-09-01	1.461	29.259
2005-10-01	1.554	27.787
2005-11-01	1.159	26.566
2005-12-01	1.333	22.587
2006-01-01	1.572	21.17
2006-02-01	0.955	21.169
2006-03-01	0.39	21.762
2006-04-01	0.649	25.252
2006-05-01	0.721	27.702
2006-06-01	0.63	30.302
2006-07-01	0.926	30.437
2006-08-01	0.769	29.695
2006-09-01	0.832	29.517
2006-10-01	0.634	28.223
2006-11-01	1.113	27.207
2006-12-01	2.139	23.961
2007-01-01	1.541	20.835
2007-02-01	1.542	21.48
2007-03-01	0.316	23.736
2007-04-01	0.908	24.688
2007-05-01	0.668	27.426
2007-06-01	0.742	30.088
2007-07-01	0.778	30.305
2007-08-01	0.766	30.458
2007-09-01	0.805	29.35
2007-10-01	1.189	26.919
2007-11-01	1.909	24.538
2007-12-01	1.187	23.274
2008-01-01	1.624	22.125
2008-02-01	1.514	18.65
2008-03-01	1.011	20.581
2008-04-01	0.797	24.999
2008-05-01	0.799	27.391
2008-06-01	0.78	28.859
2008-07-01	0.931	29.98
2008-08-01	0.946	30.311
2008-09-01	1.031	30.444
2008-10-01	1.289	28.002
2008-11-01	1.803	26.096
2008-12-01	2.135	23.399
2009-01-01	1.764	20.918
2009-02-01	1.117	22.246
2009-03-01	0.591	23.767
2009-04-01	0.658	25.832
2009-05-01	0.639	27.061
2009-06-01	0.741	29.607
2009-07-01	0.783	29.967
2009-08-01	0.772	31.141
2009-09-01	0.825	30.979
2009-10-01	1.253	28.173
2009-11-01	1.618	26.054
2009-12-01	1.445	23.489
2010-01-01	1.444	22.19
2010-02-01	1.1	23.294
2010-03-01	0.405	23.387
2010-04-01	0.363	24.23
2010-05-01	0.681	27.837
2010-06-01	0.528	29.583
2010-07-01	0.7	30.738
2010-08-01	0.739	30.425
2010-09-01	1.022	30.717
2010-10-01	1.342	27.688
2010-11-01	1.139	24.804
2010-12-01	1.572	23.425
2011-01-01	0.597	20.798
2011-02-01	3.335	20.214
2011-03-01	1.356	20.873
2011-04-01	0.955	23.012
2011-05-01	0.612	26.956
2011-06-01	0.568	28.871
2011-07-01	0.887	29.973
2011-08-01	0.871	30.249
2011-09-01	0.899	30.564
2011-10-01	1.399	26.602
2011-11-01	1.276	25.803
2011-12-01	2.27	22.853
2012-01-01	1.552	20.438
2012-02-01	1.14	20.659
2012-03-01	0.238	22.214
2012-04-01	0.669	25.534
2012-05-01	0.711	28.528
2012-06-01	0.613	29.631
2012-07-01	0.791	30.117
2012-08-01	0.951	30.379
2012-09-01	1.253	29.459
2012-10-01	0.936	28.448
2012-11-01	1.215	26.774
2012-12-01	1.48	24.941
2013-01-01	1.441	21.756
2013-02-01	1.021	22.805
2013-03-01	1.258	23.937
2013-04-01	0.616	26.172
2013-05-01	0.806	29.169
2013-06-01	0.88	29.763
2013-07-01	0.884	30.182
2013-08-01	1.281	30.39
2013-09-01	1.353	29.414
2013-10-01	1.143	27.59
2013-11-01	1.23	25.778
2013-12-01	2.076	22.973

## Sheet: 各点
time	l3m_data
(month)	[mg/m**3]			2002	2003	2004	2005	2006	2007	2008	2009	2010	2011	2012	2013	mean
2002-07-01	0.376		1		1.888	1.465	1.527	1.572	1.541	1.624	1.764	1.444	0.597	1.552	1.441	1.49227
2002-08-01	0.947		2		0.957	1.46	1.373	0.955	1.542	1.514	1.117	1.1	3.335	1.14	1.021	1.41036
2002-09-01	0.875		3		1.022	0.599	1.22	0.39	0.316	1.011	0.591	0.405	1.356	0.238	1.258	0.764182
2002-10-01	1.094		4		0.673	0.575	2.168	0.649	0.908	0.797	0.658	0.363	0.955	0.669	0.616	0.821
2002-11-01	1.416		5		0.581	0.728	0.605	0.721	0.668	0.799	0.639	0.681	0.612	0.711	0.806	0.686455
2002-12-01	1.067		6		0.666	0.819	0.352	0.63	0.742	0.78	0.741	0.528	0.568	0.613	0.88	0.665364
2003-01-01	1.888		7	0.376	0.824	0.93	0.734	0.926	0.778	0.931	0.783	0.7	0.887	0.791	0.884	0.795333
2003-02-01	0.957		8	0.947	1.005	0.888	1.416	0.769	0.766	0.946	0.772	0.739	0.871	0.951	1.281	0.945917
2003-03-01	1.022		9	0.875	0.917	0.915	1.461	0.832	0.805	1.031	0.825	1.022	0.899	1.253	1.353	1.01567
2003-04-01	0.673		10	1.094	1.074	1.622	1.554	0.634	1.189	1.289	1.253	1.342	1.399	0.936	1.143	1.21075
2003-05-01	0.581		11	1.416	1.093	1.026	1.159	1.113	1.909	1.803	1.618	1.139	1.276	1.215	1.23	1.33308
2003-06-01	0.666		12	1.067	1.759	1.377	1.333	2.139	1.187	2.135	1.445	1.572	2.27	1.48	2.076	1.65333
2003-07-01	0.824		mean	0.9625	1.03825	1.03367	1.24183	0.944167	1.02925	1.22167	1.01717	0.919583	1.25208	0.962417	1.16575
2003-08-01	1.005
2003-09-01	0.917					winter	spring	summer	autumn				winter	spring	summer	autumn
2003-10-01	1.074				2003	1.53	0.75	0.83	1.03	1.035		总	1.51	0.75	0.8	1.18
2003-11-01	1.093				2004	1.43	0.63	0.88	1.18	1.03		站5	2.72	1.82	1.47	2.27
2003-12-01	1.759				2005	1.41	1.33	0.83	1.39	1.24		站14	0.92	0.36	0.28	0.74
2004-01-01	1.465				2006	1.55	0.58	0.77	0.86	0.94		站24	2.58	2.21	1.86	2.25
2004-02-01	1.46				2007	1.42	0.63	0.76	1.3	1.0275		站24对岸	1.95	1.51	1.66	2.63
2004-03-01	0.599				2008	1.76	0.88	0.88	1.37	1.2225
2004-04-01	0.575				2009	1.44	0.63	0.76	1.23	1.015
2004-05-01	0.728				2010	1.37	0.48	0.65	1.17	0.9175
2004-06-01	0.819				2011	2.06	0.97	0.77	1.19	1.2475
2004-07-01	0.93				2012	1.39	0.54	0.78	1.13	0.96
2004-08-01	0.888				2013	1.51	0.89	1.01	1.24	1.1625
2004-09-01	0.915
2004-10-01	1.622
2004-11-01	1.026
2004-12-01	1.377
2005-01-01	1.527
2005-02-01	1.373
2005-03-01	1.22
2005-04-01	2.168
2005-05-01	0.605
2005-06-01	0.352
2005-07-01	0.734
2005-08-01	1.416
2005-09-01	1.461
2005-10-01	1.554
2005-11-01	1.159
2005-12-01	1.333
2006-01-01	1.572
2006-02-01	0.955
2006-03-01	0.39
2006-04-01	0.649
2006-05-01	0.721
2006-06-01	0.63
2006-07-01	0.926
2006-08-01	0.769
2006-09-01	0.832
2006-10-01	0.634
2006-11-01	1.113
2006-12-01	2.139
2007-01-01	1.541
2007-02-01	1.542
2007-03-01	0.316
2007-04-01	0.908
2007-05-01	0.668
2007-06-01	0.742
2007-07-01	0.778
2007-08-01	0.766
2007-09-01	0.805
2007-10-01	1.189
2007-11-01	1.909
2007-12-01	1.187
2008-01-01	1.624
2008-02-01	1.514
2008-03-01	1.011
2008-04-01	0.797
2008-05-01	0.799
2008-06-01	0.78
2008-07-01	0.931
2008-08-01	0.946
2008-09-01	1.031
2008-10-01	1.289
2008-11-01	1.803
2008-12-01	2.135
2009-01-01	1.764
2009-02-01	1.117
2009-03-01	0.591
2009-04-01	0.658
2009-05-01	0.639
2009-06-01	0.741
2009-07-01	0.783
2009-08-01	0.772
2009-09-01	0.825
2009-10-01	1.253
2009-11-01	1.618
2009-12-01	1.445
2010-01-01	1.444
2010-02-01	1.1
2010-03-01	0.405
2010-04-01	0.363
2010-05-01	0.681
2010-06-01	0.528
2010-07-01	0.7
2010-08-01	0.739
2010-09-01	1.022
2010-10-01	1.342
2010-11-01	1.139
2010-12-01	1.572
2011-01-01	0.597
2011-02-01	3.335
2011-03-01	1.356
2011-04-01	0.955
2011-05-01	0.612
2011-06-01	0.568
2011-07-01	0.887
2011-08-01	0.871
2011-09-01	0.899
2011-10-01	1.399
2011-11-01	1.276
2011-12-01	2.27
2012-01-01	1.552
2012-02-01	1.14
2012-03-01	0.238
2012-04-01	0.669
2012-05-01	0.711
2012-06-01	0.613
2012-07-01	0.791
2012-08-01	0.951
2012-09-01	1.253
2012-10-01	0.936
2012-11-01	1.215
2012-12-01	1.48
2013-01-01	1.441
2013-02-01	1.021
2013-03-01	1.258
2013-04-01	0.616
2013-05-01	0.806
2013-06-01	0.88
2013-07-01	0.884
2013-08-01	1.281
2013-09-01	1.353
2013-10-01	1.143
2013-11-01	1.23
2013-12-01	2.076

## Sheet: chla-sst-wind
	Chla	Wind
2002-07-01	0.376
2002-08-01	0.947
2002-09-01	0.875
2002-10-01	1.094
2002-11-01	1.416
2002-12-01	1.067
2003-01-01	1.888
2003-02-01	0.957	5.89302
2003-03-01	1.022	6.44186
2003-04-01	0.673	6.00465
2003-05-01	0.581	5.72093
2003-06-01	0.666	5.44186
2003-07-01	0.824	6.74884
2003-08-01	1.005	5.26047
2003-09-01	0.917	5.72093
2003-10-01	1.074	7.18605
2003-11-01	1.093	7.32558
2003-12-01	1.759	8.70233
2004-01-01	1.465	7.65581
2004-02-01	1.46	5.86047
2004-03-01	0.599	5.73023
2004-04-01	0.575	5.97674
2004-05-01	0.728	5.2
2004-06-01	0.819	5.03721
2004-07-01	0.93	6.38605
2004-08-01	0.888	4.29767
2004-09-01	0.915	4.4093
2004-10-01	1.622	7.43256
2004-11-01	1.026	6.76279
2004-12-01	1.377	7.73488
2005-01-01	1.527	7.51163
2005-02-01	1.373
2005-03-01	1.22
2005-04-01	2.168
2005-05-01	0.605
2005-06-01	0.352	6.23721
2005-07-01	0.734	6.25116
2005-08-01	1.416	5.76744
2005-09-01	1.461	7.02326
2005-10-01	1.554	7.77209
2005-11-01	1.159	7.4093
2005-12-01	1.333	9.37209
2006-01-01	1.572	7.02326
2006-02-01	0.955	7.57209
2006-03-01	0.39	5.64651
2006-04-01	0.649	6.45116
2006-05-01	0.721	6.22791
2006-06-01	0.63	5.03256
2006-07-01	0.926	6.14884
2006-08-01	0.769	5.5907
2006-09-01	0.832	7.00465
2006-10-01	0.634	6.07907
2006-11-01	1.113	6.45116
2006-12-01	2.139	9.50698
2007-01-01	1.541	7.96744
2007-02-01	1.542	6.45116
2007-03-01	0.316	7.07442
2007-04-01	0.908	6.23256
2007-05-01	0.668	4.97209
2007-06-01	0.742
2007-07-01	0.778
2007-08-01	0.766	4.13023
2007-09-01	0.805	5.13953
2007-10-01	1.189	7.96279
2007-11-01	1.909	8.85581
2007-12-01	1.187	7.56279
2008-01-01	1.624	7.45116
2008-02-01	1.514	8.37674
2008-03-01	1.011	5.61395
2008-04-01	0.797	5.92093
2008-05-01	0.799	5.73023
2008-06-01	0.78	7.10233
2008-07-01	0.931	5.52558
2008-08-01	0.946	5.76744
2008-09-01	1.031	6.23256
2008-10-01	1.289	7.2093
2008-11-01	1.803	9.26047
2008-12-01	2.135	8.64651
2009-01-01	1.764	8.13953
2009-02-01	1.117	5.95349
2009-03-01	0.591	6.93023
2009-04-01	0.658	5.60465
2009-05-01	0.639	6.4093
2009-06-01	0.741	5.49302
2009-07-01	0.783	5.23721
2009-08-01	0.772	4.42791
2009-09-01	0.825	7.48837
2009-10-01	1.253	5.50233
2009-11-01	1.618	8.33953
2009-12-01	1.445	6.84186
2010-01-01	1.444	6.55349
2010-02-01	1.1	7.62326
2010-03-01	0.405	7.32093
2010-04-01	0.363	7.13023
2010-05-01	0.681	6.31628
2010-06-01	0.528	5.70698
2010-07-01	0.7	6.06977
2010-08-01	0.739	5.44651
2010-09-01	1.022	5.0186
2010-10-01	1.342	6.55349
2010-11-01	1.139	8.31163
2010-12-01	1.572	7.11163
2011-01-01	0.597	9.26047
2011-02-01
2011-03-01	1.356	8.69767
2011-04-01	0.955	4.86512
2011-05-01	0.612	4.6186
2011-06-01	0.568	5.36279
2011-07-01	0.887	5.72093
2011-08-01	0.871	4.60465
2011-09-01	0.899	6.30698
2011-10-01	1.399	6.94884
2011-11-01	1.276	8.66977
2011-12-01	2.27	9.55814
2012-01-01	1.552	7.82326
2012-02-01	1.14	7.04651
2012-03-01	0.238	6.06512
2012-04-01	0.669	5.61395
2012-05-01	0.711	5.36744
2012-06-01	0.613	6.03256
2012-07-01	0.791	5.84186
2012-08-01	0.951	5.08837
2012-09-01	1.253	5.76744
2012-10-01	0.936	6.32558
2012-11-01	1.215	7.08372
2012-12-01	1.48	7.32093
2013-01-01	1.441	7.85116
2013-02-01	1.021	6.45116
2013-03-01	1.258	6.90698
2013-04-01	0.616	6.95349
2013-05-01	0.806	5.87442
2013-06-01	0.88	5.9814
2013-07-01	0.884	6.04186
2013-08-01	1.281	6.65581
2013-09-01	1.353	6.83721
2013-10-01	1.143	7.32093
2013-11-01	1.23	9.54419
2013-12-01	2.076	8.07442
2013-01-01	1.49227	6.86512
2013-02-01	1.41036	6.1814
2013-03-01	0.764182	6.54884
2013-04-01	0.821	6.12093
2013-05-01	0.686455	5.1814
2013-06-01	0.665364	5.04651
2013-07-01	0.795333	6.29767
2013-08-01	0.945917	5.2452
2013-09-01	1.01567	6.16256
2013-10-01	1.21075	6.82543
2013-11-01	1.33308	8.4572
2013-12-01	1.65333	8.35473

## Sheet: Sheet1
2002-07-01	0.376			1	2	3	4	5	6	7	8	9	10	11	12
2002-08-01	0.947		2002							0.376	0.947	0.875	1.094	1.416	1.067
2002-09-01	0.875		2003	1.888	0.957	1.022	0.673	0.581	0.666	0.824	1.005	0.917	1.074	1.093	1.759
2002-10-01	1.094		2004	1.465	1.46	0.599	0.575	0.728	0.819	0.93	0.888	0.915	1.622	1.026	1.377
2002-11-01	1.416		2005	1.527	1.373	1.22	2.168	0.605	0.352	0.734	1.416	1.461	1.554	1.159	1.333
2002-12-01	1.067		2006	1.572	0.955	0.39	0.649	0.721	0.63	0.926	0.769	0.832	0.634	1.113	2.139
2003-01-01	1.888		2007	1.541	1.542	0.316	0.908	0.668	0.742	0.778	0.766	0.805	1.189	1.909	1.187
2003-02-01	0.957		2008	1.624	1.514	1.011	0.797	0.799	0.78	0.931	0.946	1.031	1.289	1.803	2.135
2003-03-01	1.022		2009	1.764	1.117	0.591	0.658	0.639	0.741	0.783	0.772	0.825	1.253	1.618	1.445
2003-04-01	0.673		2010	1.444	1.1	0.405	0.363	0.681	0.528	0.7	0.739	1.022	1.342	1.139	1.572
2003-05-01	0.581		2011	0.597	3.335	1.356	0.955	0.612	0.568	0.887	0.871	0.899	1.399	1.276	2.27
2003-06-01	0.666		2012	1.552	1.14	0.238	0.669	0.711	0.613	0.791	0.951	1.253	0.936	1.215	1.48
2003-07-01	0.824		2013	1.441	1.021	1.258	0.616	0.806	0.88	0.884	1.281	1.353	1.143	1.23	2.076
2003-08-01	1.005			1.49227	1.41036	0.764182	0.821	0.686455	0.665364	0.795333	0.945917	1.01567	1.21075	1.33308	1.65333
2003-09-01	0.917
2003-10-01	1.074
2003-11-01	1.093
2003-12-01	1.759
2004-01-01	1.465
2004-02-01	1.46
2004-03-01	0.599
2004-04-01	0.575
2004-05-01	0.728
2004-06-01	0.819
2004-07-01	0.93
2004-08-01	0.888
2004-09-01	0.915
2004-10-01	1.622
2004-11-01	1.026
2004-12-01	1.377
2005-01-01	1.527
2005-02-01	1.373
2005-03-01	1.22
2005-04-01	2.168
2005-05-01	0.605
2005-06-01	0.352
2005-07-01	0.734
2005-08-01	1.416
2005-09-01	1.461
2005-10-01	1.554
2005-11-01	1.159
2005-12-01	1.333
2006-01-01	1.572
2006-02-01	0.955
2006-03-01	0.39
2006-04-01	0.649
2006-05-01	0.721
2006-06-01	0.63
2006-07-01	0.926
2006-08-01	0.769
2006-09-01	0.832
2006-10-01	0.634
2006-11-01	1.113
2006-12-01	2.139
2007-01-01	1.541
2007-02-01	1.542
2007-03-01	0.316
2007-04-01	0.908
2007-05-01	0.668
2007-06-01	0.742
2007-07-01	0.778
2007-08-01	0.766
2007-09-01	0.805
2007-10-01	1.189
2007-11-01	1.909
2007-12-01	1.187
2008-01-01	1.624
2008-02-01	1.514
2008-03-01	1.011
2008-04-01	0.797
2008-05-01	0.799
2008-06-01	0.78
2008-07-01	0.931
2008-08-01	0.946
2008-09-01	1.031
2008-10-01	1.289
2008-11-01	1.803
2008-12-01	2.135
2009-01-01	1.764
2009-02-01	1.117
2009-03-01	0.591
2009-04-01	0.658
2009-05-01	0.639
2009-06-01	0.741
2009-07-01	0.783
2009-08-01	0.772
2009-09-01	0.825
2009-10-01	1.253
2009-11-01	1.618
2009-12-01	1.445
2010-01-01	1.444
2010-02-01	1.1
2010-03-01	0.405
2010-04-01	0.363
2010-05-01	0.681
2010-06-01	0.528
2010-07-01	0.7
2010-08-01	0.739
2010-09-01	1.022
2010-10-01	1.342
2010-11-01	1.139
2010-12-01	1.572
2011-01-01	0.597
2011-02-01	3.335
2011-03-01	1.356
2011-04-01	0.955
2011-05-01	0.612
2011-06-01	0.568
2011-07-01	0.887
2011-08-01	0.871
2011-09-01	0.899
2011-10-01	1.399
2011-11-01	1.276
2011-12-01	2.27
2012-01-01	1.552
2012-02-01	1.14
2012-03-01	0.238
2012-04-01	0.669
2012-05-01	0.711
2012-06-01	0.613
2012-07-01	0.791
2012-08-01	0.951
2012-09-01	1.253
2012-10-01	0.936
2012-11-01	1.215
2012-12-01	1.48
2013-01-01	1.441
2013-02-01	1.021
2013-03-01	1.258
2013-04-01	0.616
2013-05-01	0.806
2013-06-01	0.88
2013-07-01	0.884
2013-08-01	1.281
2013-09-01	1.353
2013-10-01	1.143
2013-11-01	1.23
2013-12-01	2.076

## Sheet: lagged
Chla	Wind	滞后一个月	滞后两个月	Wind
0.376
0.947		0.376
0.875		0.947	0.376
1.094		0.875	0.947
1.416		1.094	0.875
1.067		1.416	1.094
1.888		1.067	1.416
0.957	5.89302	1.888	1.067	5.89302			0.494773
1.022	6.44186	0.957	1.888	6.44186
0.673	6.00465	1.022	0.957	6.00465
0.581	5.72093	0.673	1.022	5.72093
0.666	5.44186	0.581	0.673	5.44186
0.824	6.74884	0.666	0.581	6.74884
1.005	5.26047	0.824	0.666	5.26047
0.917	5.72093	1.005	0.824	5.72093
1.074	7.18605	0.917	1.005	7.18605
1.093	7.32558	1.074	0.917	7.32558
1.759	8.70233	1.093	1.074	8.70233
1.465	7.65581	1.759	1.093	7.65581
1.46	5.86047	1.465	1.759	5.86047
0.599	5.73023	1.46	1.465	5.73023
0.575	5.97674	0.599	1.46	5.97674
0.728	5.2	0.575	0.599	5.2
0.819	5.03721	0.728	0.575	5.03721
0.93	6.38605	0.819	0.728	6.38605
0.888	4.29767	0.93	0.819	4.29767
0.915	4.4093	0.888	0.93	4.4093
1.622	7.43256	0.915	0.888	7.43256
1.026	6.76279	1.622	0.915	6.76279
1.377	7.73488	1.026	1.622	7.73488
1.527	7.51163	1.377	1.026	7.51163
1.373		1.527	1.377
1.22		1.373	1.527
2.168		1.22	1.373
0.605		2.168	1.22
0.352	6.23721	0.605	2.168	6.23721
0.734	6.25116	0.352	0.605	6.25116
1.416	5.76744	0.734	0.352	5.76744
1.461	7.02326	1.416	0.734	7.02326
1.554	7.77209	1.461	1.416	7.77209
1.159	7.4093	1.554	1.461	7.4093
1.333	9.37209	1.159	1.554	9.37209
1.572	7.02326	1.333	1.159	7.02326
0.955	7.57209	1.572	1.333	7.57209
0.39	5.64651	0.955	1.572	5.64651
0.649	6.45116	0.39	0.955	6.45116
0.721	6.22791	0.649	0.39	6.22791
0.63	5.03256	0.721	0.649	5.03256
0.926	6.14884	0.63	0.721	6.14884
0.769	5.5907	0.926	0.63	5.5907
0.832	7.00465	0.769	0.926	7.00465
0.634	6.07907	0.832	0.769	6.07907
1.113	6.45116	0.634	0.832	6.45116
2.139	9.50698	1.113	0.634	9.50698
1.541	7.96744	2.139	1.113	7.96744
1.542	6.45116	1.541	2.139	6.45116
0.316	7.07442	1.542	1.541	7.07442
0.908	6.23256	0.316	1.542	6.23256
0.668	4.97209	0.908	0.316	4.97209
0.742		0.668	0.908
0.778		0.742	0.668
0.766	4.13023	0.778	0.742	4.13023
0.805	5.13953	0.766	0.778	5.13953
1.189	7.96279	0.805	0.766	7.96279
1.909	8.85581	1.189	0.805	8.85581
1.187	7.56279	1.909	1.189	7.56279
1.624	7.45116	1.187	1.909	7.45116
1.514	8.37674	1.624	1.187	8.37674
1.011	5.61395	1.514	1.624	5.61395
0.797	5.92093	1.011	1.514	5.92093
0.799	5.73023	0.797	1.011	5.73023
0.78	7.10233	0.799	0.797	7.10233
0.931	5.52558	0.78	0.799	5.52558
0.946	5.76744	0.931	0.78	5.76744
1.031	6.23256	0.946	0.931	6.23256
1.289	7.2093	1.031	0.946	7.2093
1.803	9.26047	1.289	1.031	9.26047
2.135	8.64651	1.803	1.289	8.64651
1.764	8.13953	2.135	1.803	8.13953
1.117	5.95349	1.764	2.135	5.95349
0.591	6.93023	1.117	1.764	6.93023
0.658	5.60465	0.591	1.117	5.60465
0.639	6.4093	0.658	0.591	6.4093
0.741	5.49302	0.639	0.658	5.49302
0.783	5.23721	0.741	0.639	5.23721
0.772	4.42791	0.783	0.741	4.42791
0.825	7.48837	0.772	0.783	7.48837
1.253	5.50233	0.825	0.772	5.50233
1.618	8.33953	1.253	0.825	8.33953
1.445	6.84186	1.618	1.253	6.84186
1.444	6.55349	1.445	1.618	6.55349
1.1	7.62326	1.444	1.445	7.62326
0.405	7.32093	1.1	1.444	7.32093
0.363	7.13023	0.405	1.1	7.13023
0.681	6.31628	0.363	0.405	6.31628
0.528	5.70698	0.681	0.363	5.70698
0.7	6.06977	0.528	0.681	6.06977
0.739	5.44651	0.7	0.528	5.44651
1.022	5.0186	0.739	0.7	5.0186
1.342	6.55349	1.022	0.739	6.55349
1.139	8.31163	1.342	1.022	8.31163
1.572	7.11163	1.139	1.342	7.11163
0.597	9.26047	1.572	1.139	9.26047
		0.597	1.572
1.356	8.69767		0.597	8.69767
0.955	4.86512	1.356		4.86512
0.612	4.6186	0.955	1.356	4.6186
0.568	5.36279	0.612	0.955	5.36279
0.887	5.72093	0.568	0.612	5.72093
0.871	4.60465	0.887	0.568	4.60465
0.899	6.30698	0.871	0.887	6.30698
1.399	6.94884	0.899	0.871	6.94884
1.276	8.66977	1.399	0.899	8.66977
2.27	9.55814	1.276	1.399	9.55814
1.552	7.82326	2.27	1.276	7.82326
1.14	7.04651	1.552	2.27	7.04651
0.238	6.06512	1.14	1.552	6.06512
0.669	5.61395	0.238	1.14	5.61395
0.711	5.36744	0.669	0.238	5.36744
0.613	6.03256	0.711	0.669	6.03256
0.791	5.84186	0.613	0.711	5.84186
0.951	5.08837	0.791	0.613	5.08837
1.253	5.76744	0.951	0.791	5.76744
0.936	6.32558	1.253	0.951	6.32558
1.215	7.08372	0.936	1.253	7.08372
1.48	7.32093	1.215	0.936	7.32093
1.441	7.85116	1.48	1.215	7.85116
1.021	6.45116	1.441	1.48	6.45116
1.258	6.90698	1.021	1.441	6.90698
0.616	6.95349	1.258	1.021	6.95349
0.806	5.87442	0.616	1.258	5.87442
0.88	5.9814	0.806	0.616	5.9814
0.884	6.04186	0.88	0.806	6.04186
1.281	6.65581	0.884	0.88	6.65581
1.353	6.83721	1.281	0.884	6.83721
1.143	7.32093	1.353	1.281	7.32093
1.23	9.54419	1.143	1.353	9.54419
2.076	8.07442	1.23	1.143	8.07442
		2.076	1.23
			2.076
